# Supplementary material for: Cantilever signature of tip detachment during contact resonance AFM
Source: publisher site journal article supplement (doi:10.3762/bjnano.12.96), 2021-11-24
Supplement: Additional file 1 [file 2190-4286-12-96-S1.pdf]

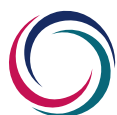

## Supporting Information

for

### **Cantilever signature of tip detachment during contact resonance AFM**

Devin Kalafut, Ryan Wagner, Maria Jose Cadena, Anil Bajaj and Arvind Raman

*Beilstein J. Nanotechnol.* **2021**, *12*, 1286–1296. doi:10.3762/bjnano.12.96

### **Additional AFM measurements**

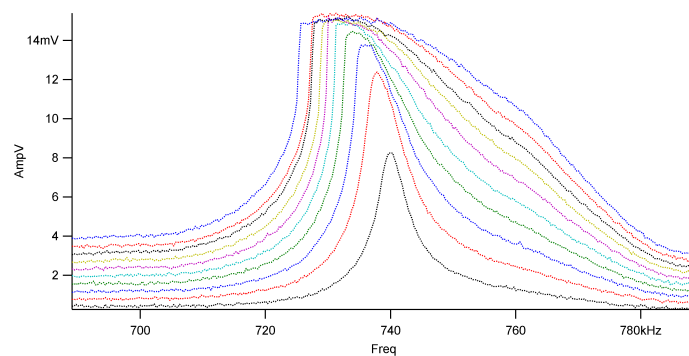

(a)

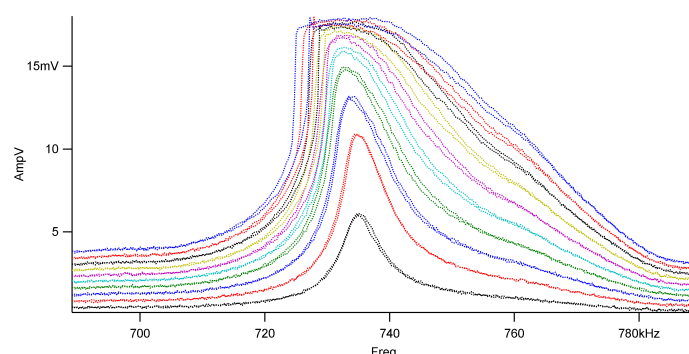

(b)

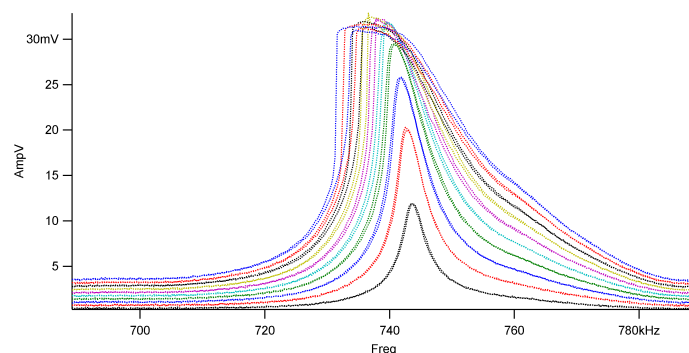

(c)

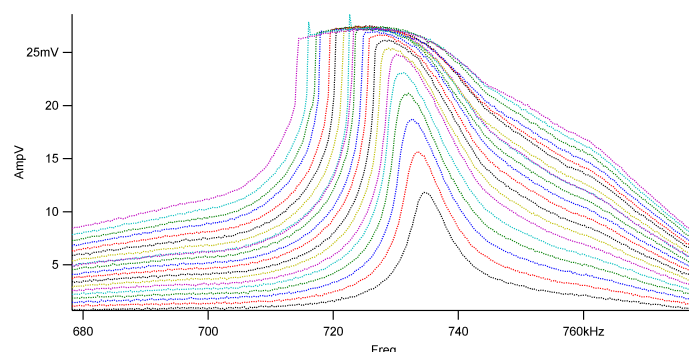

(d)

Figure S1: Additional evidence of tip-sample detachment on silicon samples at various piezoelectric drive amplitudes, shown as photodiode detector amplitude vs drive frequency.
