# Supplementary material for: Cantilever signature of tip detachment during contact resonance AFM
Source: publisher site journal article supplement (doi:10.3762/bjnano.12.96), 2021-11-24
Supplement: Additional file 2 [file 2190-4286-12-96-S2.pdf]

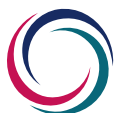

## Supporting Information

for

### **Cantilever signature of tip detachment during contact resonance AFM**

Devin Kalafut, Ryan Wagner, Maria Jose Cadena, Anil Bajaj and Arvind Raman

*Beilstein J. Nanotechnol.* **2021**, *12*, 1286–1296. [doi:10.3762/bjnano.12.96](https://doi.org/10.3762/bjnano.12.96)

### **Hypothetical simulations with NNMs**

Table S1: Parameter values for hypothetical simulation example

| Parameter                | Value                                |
|--------------------------|--------------------------------------|
| $L$ ( $\gamma = L_1/L$ ) | 300 $\mu\text{m}$ (0.97)             |
| $L_{bD}$                 | $0.1 \cdot L$                        |
| $h$                      | 4 $\mu\text{m}$                      |
| $b$                      | 20 $\mu\text{m}$                     |
| $\rho$                   | 2330 $\text{kg} \cdot \text{m}^{-3}$ |
| $E$                      | 169 GPa                              |
| $\nu$                    | 0.278                                |
| $R$                      | 10 nm                                |
| $E_{sample}$             | 10 GPa                               |
| $\nu_{sample}$           | 0.3                                  |
| $F_{Adh}$                | 20 nm                                |
| $g_{adh}$                | 10 nm                                |
| $P$                      | 1.5 (Hertz)                          |
| $Q$                      | 100                                  |
| $F_{TS}$                 | 200 nN                               |

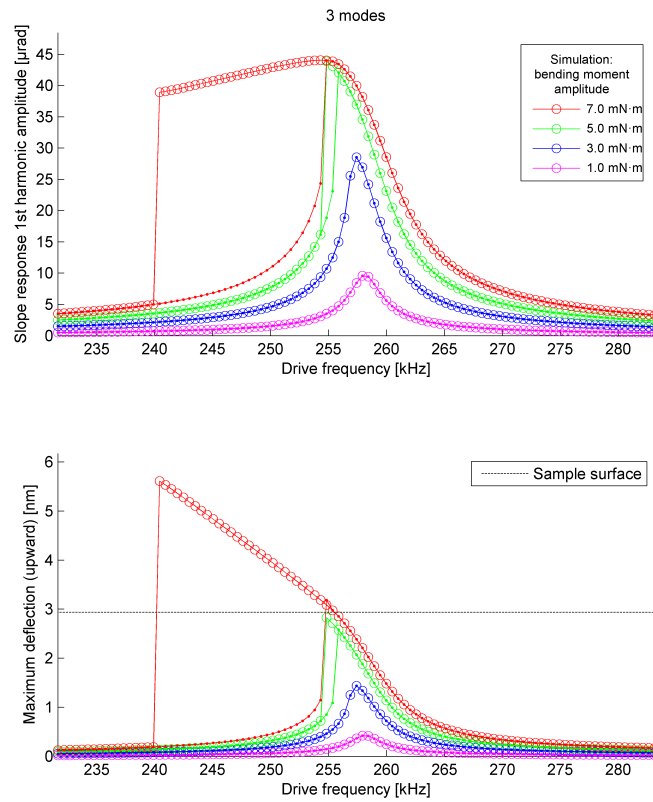

Figure S1: Dynamic simulations of a hypothetical cantilever system (parameter values in Table 1) driven about contact resonance frequency using only three free cantilever eigenfunctions as a basis set. Slope response first harmonic amplitude versus drive frequency (upper) and maximum probe displacement versus drive frequency (lower).

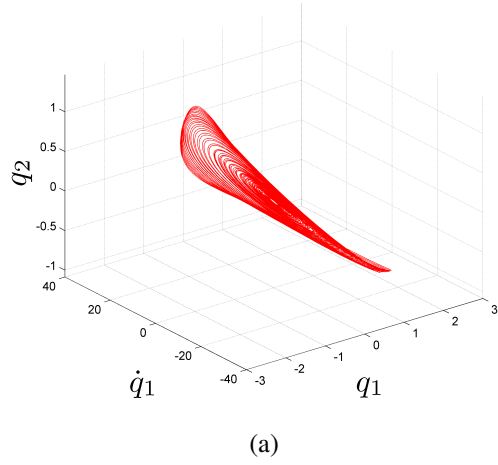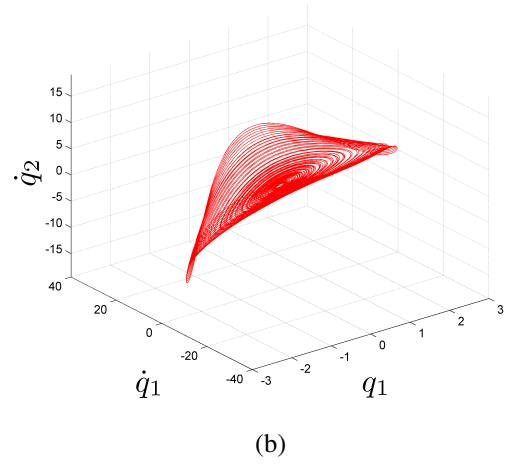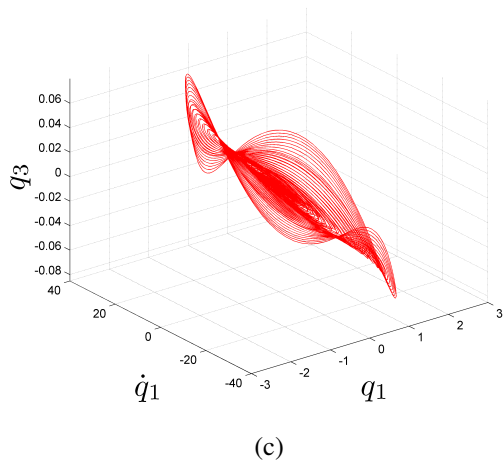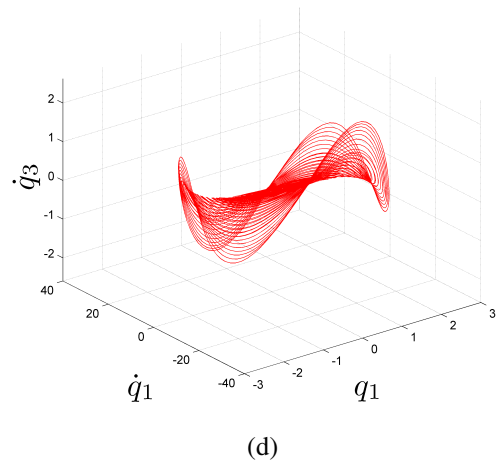

Figure S2: Steady-state periodic orbits (nonlinear normal modes) from hypothetical simulations (parameter values in Table 1) in Figure 1 projected onto phase space comprised of state variables. Second basis function displacement  $q_2$  (a) and velocity  $\dot{q}_2$  (b), as well as third basis function displacement  $q_3$  (c) and velocity  $\dot{q}_3$  (d) are plotted against first basis function displacement  $q_1$  and velocity  $\dot{q}_1$ .
